# Supplementary material for: The Anti-Dengue Virus Peptide DV2 Inhibits Zika Virus Both In Vitro and In Vivo
Source: MDPI journal article supplement (doi:10.3390/v15040839), 2023-03-25
Supplement: s1 [file s1]

# Supplementary Materials:

**Table S1.** Prediction of non-covalent interactions between the ZIKV E protein and the synthetic DV2 peptide in the postfusion conformation according to the PLIP tool [20]. Residues in bold belong to domain I and in black belong to domain II.

| Protein residue          |     | Peptide residue |     | Distance (Å) |
|--------------------------|-----|-----------------|-----|--------------|
| Hydrophobic interactions |     |                 |     |              |
| Trp                      | 167 | Phe             | 429 | 3.05         |
| Trp                      | 167 | Phe             | 429 | 2.93         |
| Trp                      | 167 | Ile             | 432 | 3.86         |
| Trp                      | 167 | Ile             | 432 | 3.47         |
| Ile                      | 171 | Ile             | 432 | 2.94         |
| Phe                      | 195 | Ala             | 446 | 3.59         |
| Val                      | 206 | Ile             | 443 | 3.94         |
| Leu                      | 208 | Ile             | 443 | 3.37         |
| Ala                      | 214 | Leu             | 436 | 3.15         |
| Ala                      | 218 | Ile             | 432 | 3.67         |
| Ala                      | 222 | Leu             | 425 | 3.91         |
| Leu                      | 223 | Leu             | 425 | 3.75         |
| Glu                      | 270 | Phe             | 422 | 2.94         |
| Val                      | 276 | Phe             | 422 | 3.61         |
| Trp                      | 350 | Phe             | 422 | 3.03         |
| Arg                      | 352 | Phe             | 422 | 3.12         |
| Hydrogen bonds           |     |                 |     |              |
| Thr                      | 45  | Ala             | 447 | 2.93         |
| Leu                      | 219 | Val             | 428 | 2.85         |
| His                      | 351 | Phe             | 422 | 2.40         |
| Ser                      | 353 | Gly             | 423 | 3.36         |
| Salt Bridges             |     |                 |     |              |
| His                      | 348 | Trp             | 420 | 5.66         |
| His                      | 348 | Trp             | 420 | 5.94         |

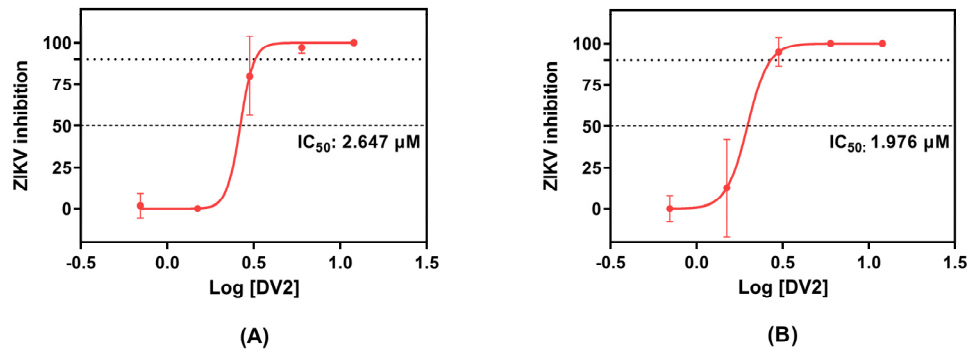

|                                  |                 |                  |
|----------------------------------|-----------------|------------------|
| LogIC <sub>50</sub> (Std. Error) | 0.4228 (0.1421) | 0.2957 (0.04430) |
| HillSlope (Std. Error)           | 11.08 (28.93)   | 7.050 (2.378)    |
| R <sup>2</sup>                   | 0.9459          | 0.9386           |

**Figure S1.** Determination of DV2 peptide IC<sub>50</sub> values against ZIKV through different techniques. IC<sub>50</sub> was calculated using (A) flow cytometry and (B) plaque assays from a 2-fold dilution series. The IC<sub>50</sub> curves were plotted using GraphPad Prism v. 9.0.0.
